# Supplementary material for: Facile synthesis, magnetic, electrical and photoelectric properties of layered quaternary chalcogenides K2FeCu3Q4 (Q = S and Se)
Source: Royal Society of Chemistry journal article supplement (doi:10.1039/c3ce42065e), 2013-11-26
Supplement: c3ce42065e.pdf [file c3ce42065e.pdf]

Supplementary information for:

**Facile synthesis, magnetic, electrical and photoelectric properties of layered quaternary chalcogenides  $K_2FeCu_3Q_4$  (Q = S and Se)**

Ganghua Zhang,<sup>a</sup> Haijie Chen,<sup>a</sup> Yian Xie<sup>a</sup> and Fuqiang Huang<sup>\*a,b</sup>

*<sup>a</sup>CAS Key Laboratory of Materials for Energy Conversion, Shanghai Institute of Ceramics, Chinese Academy of Sciences, Shanghai 200050, P. R. China; <sup>b</sup>State Key Laboratory of Rare Earth Materials Chemistry and Applications, College of Chemistry and Molecular Engineering, Peking University, Beijing 100871 P. R. China.*

*Correspondence should be addressed to [huangfq@mail.sic.ac.cn](mailto:huangfq@mail.sic.ac.cn)*

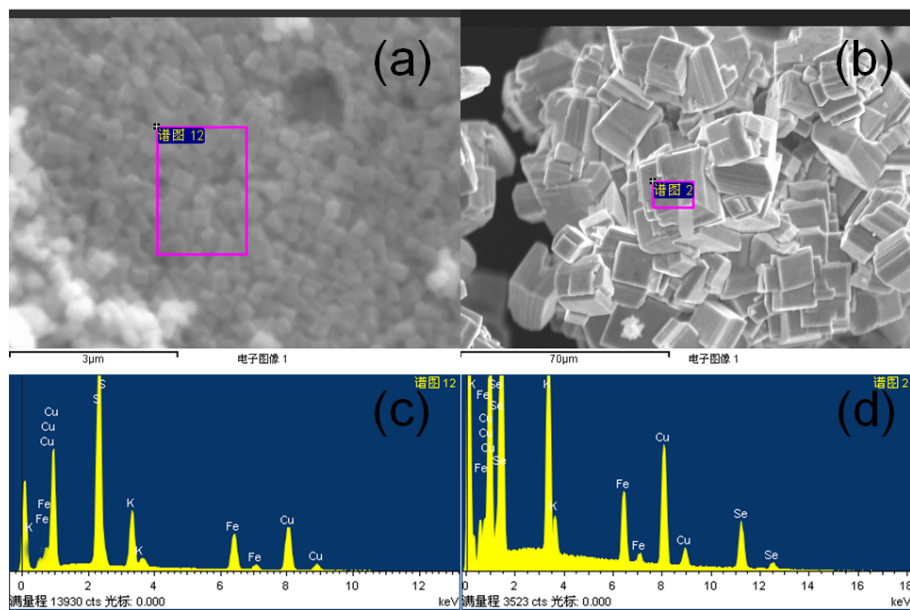

**Figure S1.** SEM images of crystalline samples: (a) for  $\text{K}_2\text{FeCu}_3\text{S}_4$  and (b) for  $\text{K}_2\text{FeCu}_3\text{Se}_4$ . EDX results of  $\text{K}_2\text{FeCu}_3\text{S}_4$  (c) and  $\text{K}_2\text{FeCu}_3\text{Se}_4$  (d).

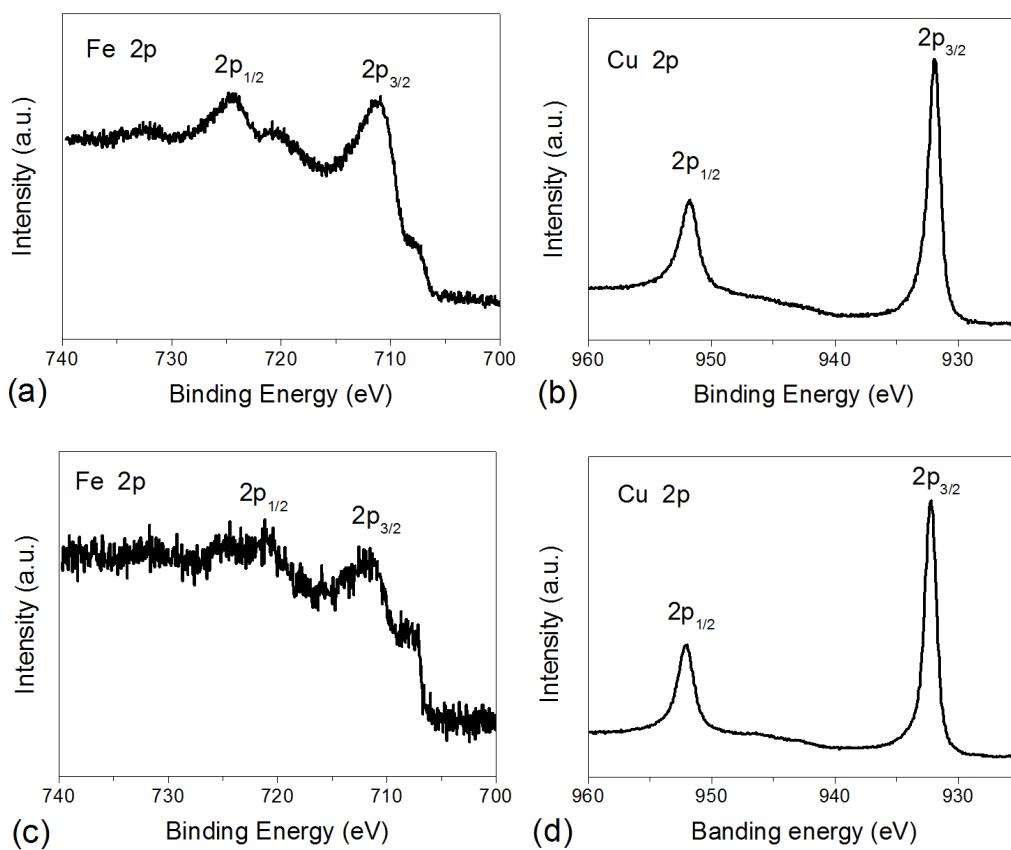

**Figure S2.** XPS spectrum of Fe 2p and Cu 2p: (a) (b) for  $K_2FeCu_3S_4$  and (c) (d) for  $K_2FeCu_3Se_4$ .

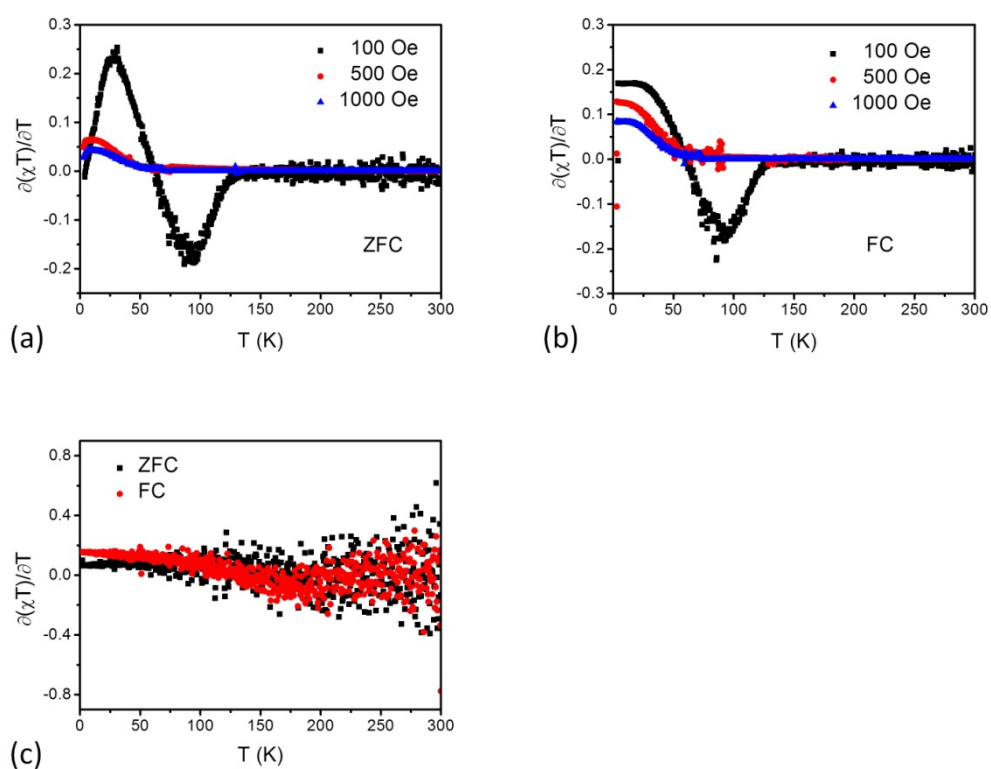

**Figure S3.** The derivative of the curves  $\chi T$  vs.  $T$  for  $K_2FeCu_3S_4$  (a and b) and  $K_2FeCu_3Se_4$  (c).

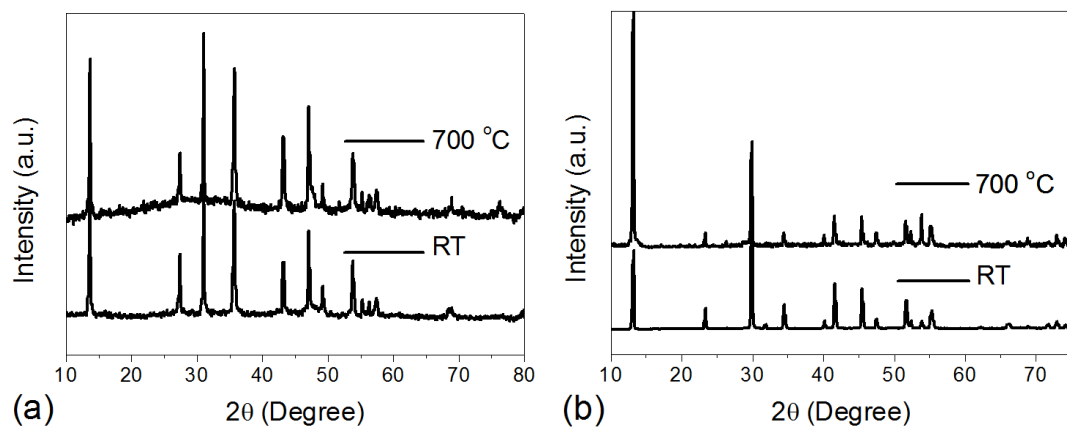

**Figure S4.** The powder XRD of  $K_2FeCu_3S_4$  (a) and  $K_2FeCu_3Se_4$  (b) samples annealed at room temperature (RT) and  $700\text{ }^\circ\text{C}$
